# Supplementary material for: Antibacterial activity of novel Cu2ZnSnS4 nanoparticles against pathogenic strains
Source: Royal Society of Chemistry journal article supplement (doi:10.1039/c5ra15027b), 2015-01-01
Supplement: c5ra15027b1.pdf [file c5ra15027b1.pdf]

## Electronic Supplementary Information

### Antibacterial activity of novel $\text{Cu}_2\text{ZnSnS}_4$ nanoparticles against pathogenic strains

**R. Saravana Kumar<sup>a</sup>, Sateesh Maddirevula<sup>b</sup>, Maheswaran Easwaran<sup>c</sup>, S.H.S. Dananjaya<sup>d</sup>, Moon-Deock Kim<sup>a\*</sup>**

*<sup>a</sup>Department of Physics, Chungnam National University, 220 Gung-Dong, Yuseong-Gu, Daejeon 305-764, South Korea.*

*<sup>b</sup>Department of Genetics, King Faisal Specialist Hospital and Research Center, Riyadh, Saudi Arabia.*

*<sup>c</sup>Laboratory of Infectious Disease, College of Veterinary Medicine, Chungnam National University, Daejeon 305-764, South Korea.*

*<sup>d</sup>Laboratory of Aquatic Animal Disease, College of Veterinary Medicine, Chungnam National University, Daejeon 305-764, South Korea.*

\*Corresponding author e-mail: [mdkim@cnu.ac.kr](mailto:mdkim@cnu.ac.kr)

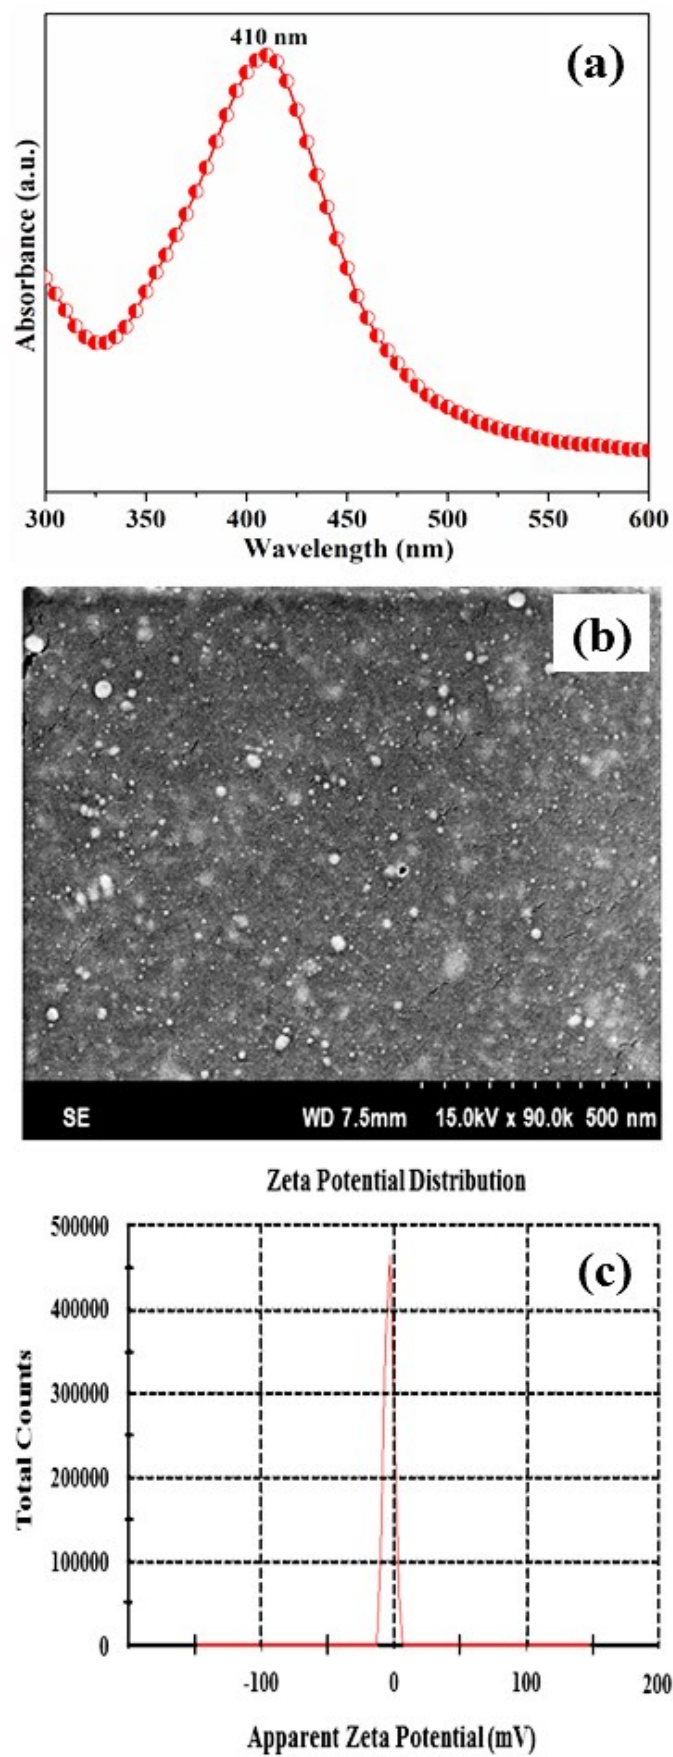

**Figure S1.** (a) UV-vis absorption spectra, (b) SEM image and (c) Zeta-potential of Ag-NPs.

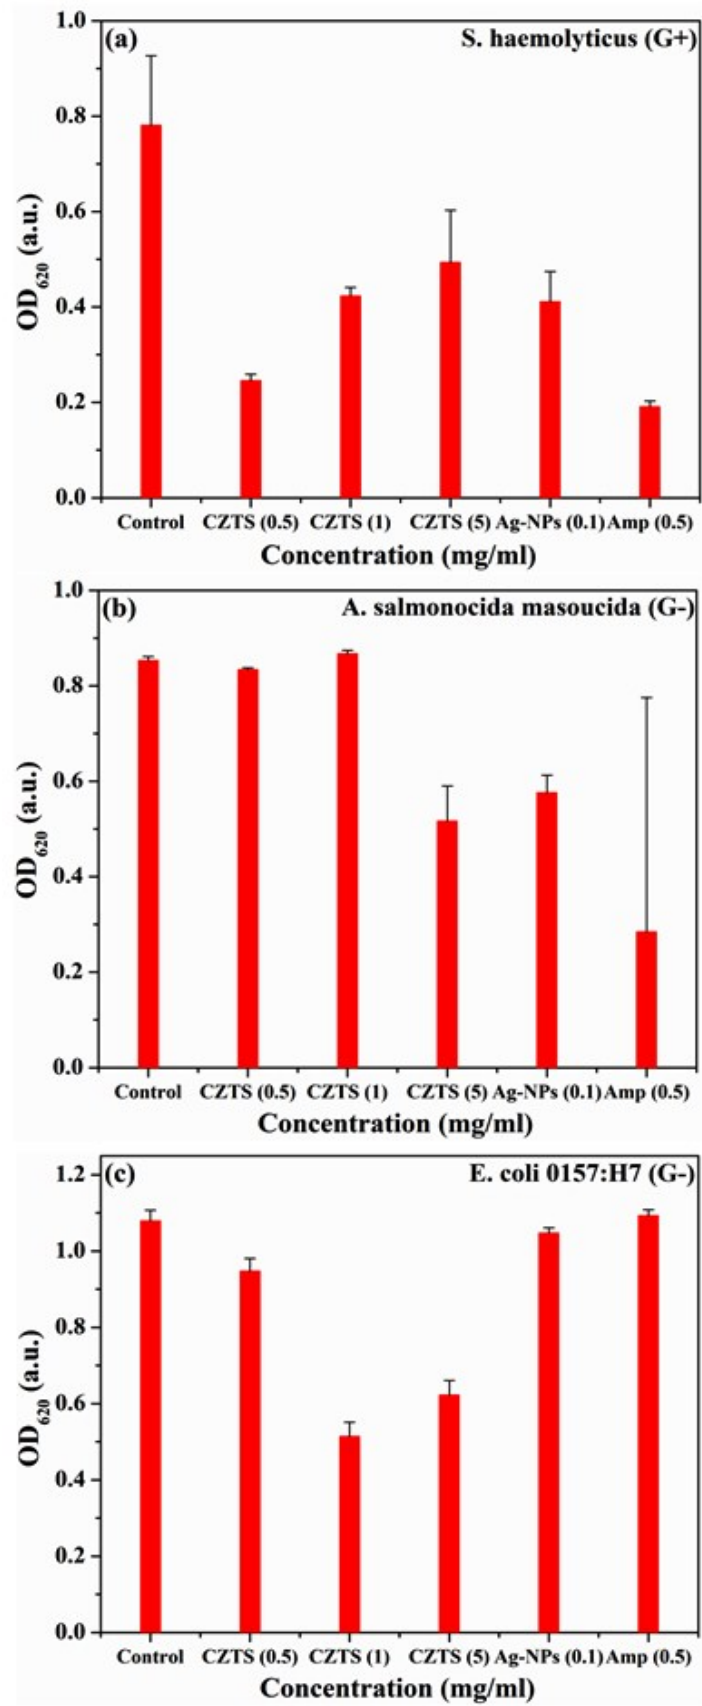

**Figure S2.** Minimal inhibitory concentration for CZTS particles and different controls against *G+* and *G-* bacteria
